# Supplementary material for: High-directionality spin-selective routing of photons in plasmonic nanocircuits
Source: Royal Society of Chemistry journal article supplement (doi:10.1039/d1nr05733b), 2021-12-06
Supplement: d1nr05733b1.pdf [file d1nr05733b1.pdf]

# Supporting Information for

## High-Directionality Spin-Selective Routing of Photons in Plasmonic Nanocircuits

Youqiao Ma,<sup>\*a</sup> Bo Liu<sup>a</sup>, Zhiqin Huang<sup>a</sup>, Jinhua Li<sup>a</sup>, Zhanghua Han<sup>b</sup>, Di Wu<sup>c</sup>, Jun Zhou<sup>d</sup>,  
Yuan Ma<sup>e</sup>, Qiang Wu<sup>f</sup> and Hiroshi Maeda<sup>g</sup>

---

<sup>a</sup> School of Physics and Optoelectronic Engineering, Nanjing University of Information Science and Technology, Nanjing, 210044, China.

<sup>b</sup> Shandong Key Laboratory of Optics and Photonic Devices, School of Physics and Electronics, Shandong Normal University, Jinan 250358, China.

<sup>c</sup> School of Physics and Microelectronics, Key Laboratory of Materials Physics, Ministry of Education, Zhengzhou University, Zhengzhou, Henan 450052, China.

<sup>d</sup> Institute of Photonics, Faculty of Science, Ningbo University, Ningbo 315211, China.

<sup>e</sup> Department of Electrical and Computer Engineering, Dalhousie University, Halifax, NS B3J 2X4, Canada.

<sup>f</sup> Department of physics and electrical engineering, Northumbria University, Newcastle, NE18ST United Kingdom.

<sup>g</sup> Department of Information and Communication Engineering, Fukuoka Institute of Technology, Fukuoka 811-0295, Japan.

\* E-mail: [mayouqiao188@hotmail.com](mailto:mayouqiao188@hotmail.com).

## S1: FDTD simulation and optimization of the geometric parameters under normal and non-normal incidence

### S1.1: Design optimization of geometry under normal illumination

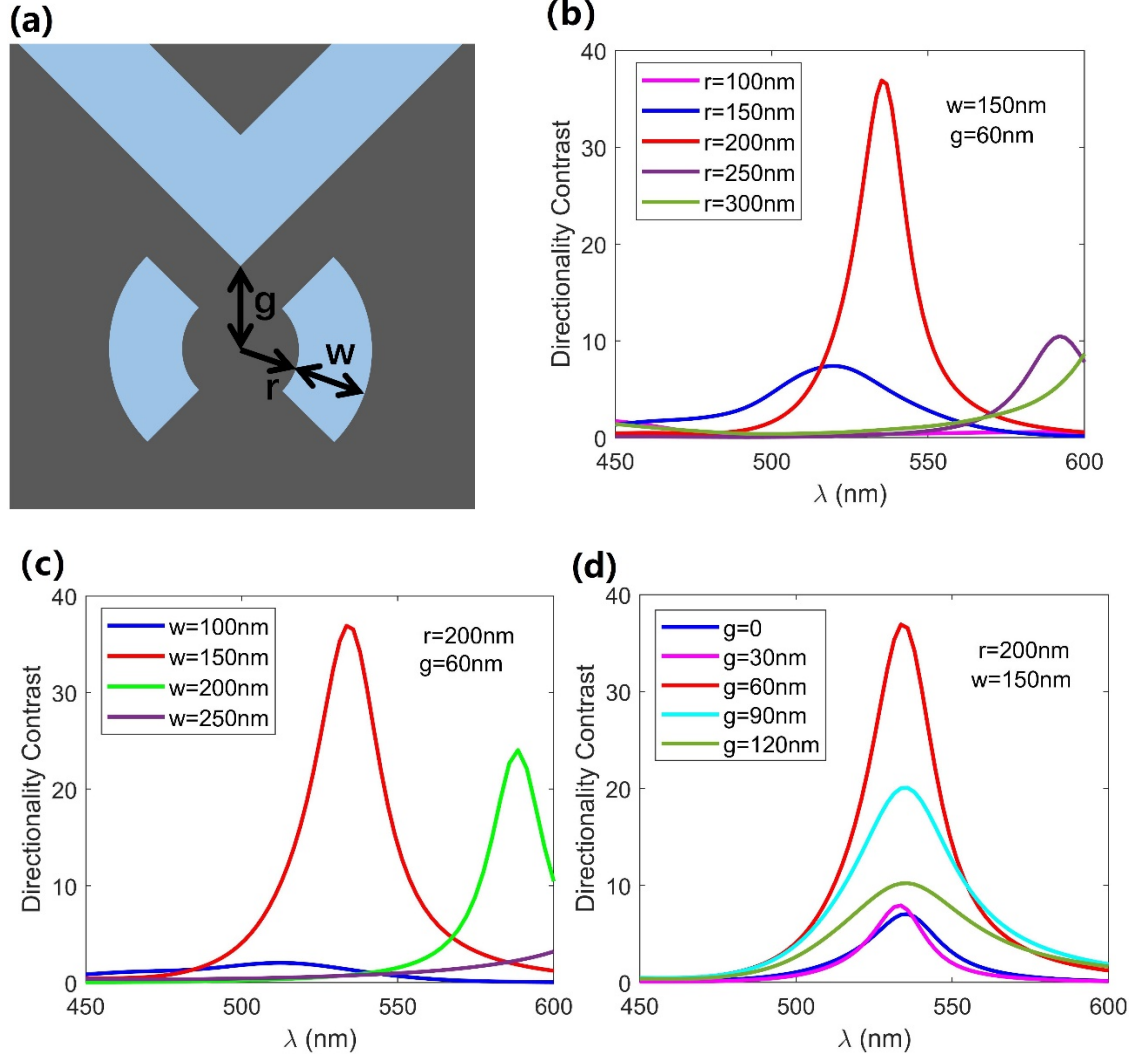

**Figure S1.1.** 3D-FDTD design optimization of the proposed device for larger directionality contrast between the two branching DLSPs waveguide channels. The directionality contrast is defined as  $I_L / I_R$  under LCP illumination. (a) The top view of the SRC with inner radius of  $r$  and width of  $w$ . The distance between the center of SRC and the apex of two orthogonal DLSPs waveguides is noted as  $g$ . (b) Directionality contrast as a function of excitation wavelength for different inner radius  $r$  while keeping the values of  $w$  and  $g$  constant as  $w = 150$  nm and  $g = 60$  nm, respectively. Due to the resonant characteristics of SRC, a strong peak is observed at  $\lambda = 532$  nm for  $r = 200$  nm with a maximum directionality contrast. (c) Directionality contrast as a function of wavelength for different ring width  $w$  while keeping  $r = 200$  nm and  $g = 60$  nm reveals the optimal value of  $w = 150$  nm. (d) Directionality contrast as a function of wavelength for device with optimized parameters of  $r = 200$  nm and  $w = 150$  nm while varying the value of  $g$ . Due to the fact that the parameters of SRC are fixed, thus the location of resonant peak is almost unchanged.

## S1.2: Optical response of device under non-normal illumination

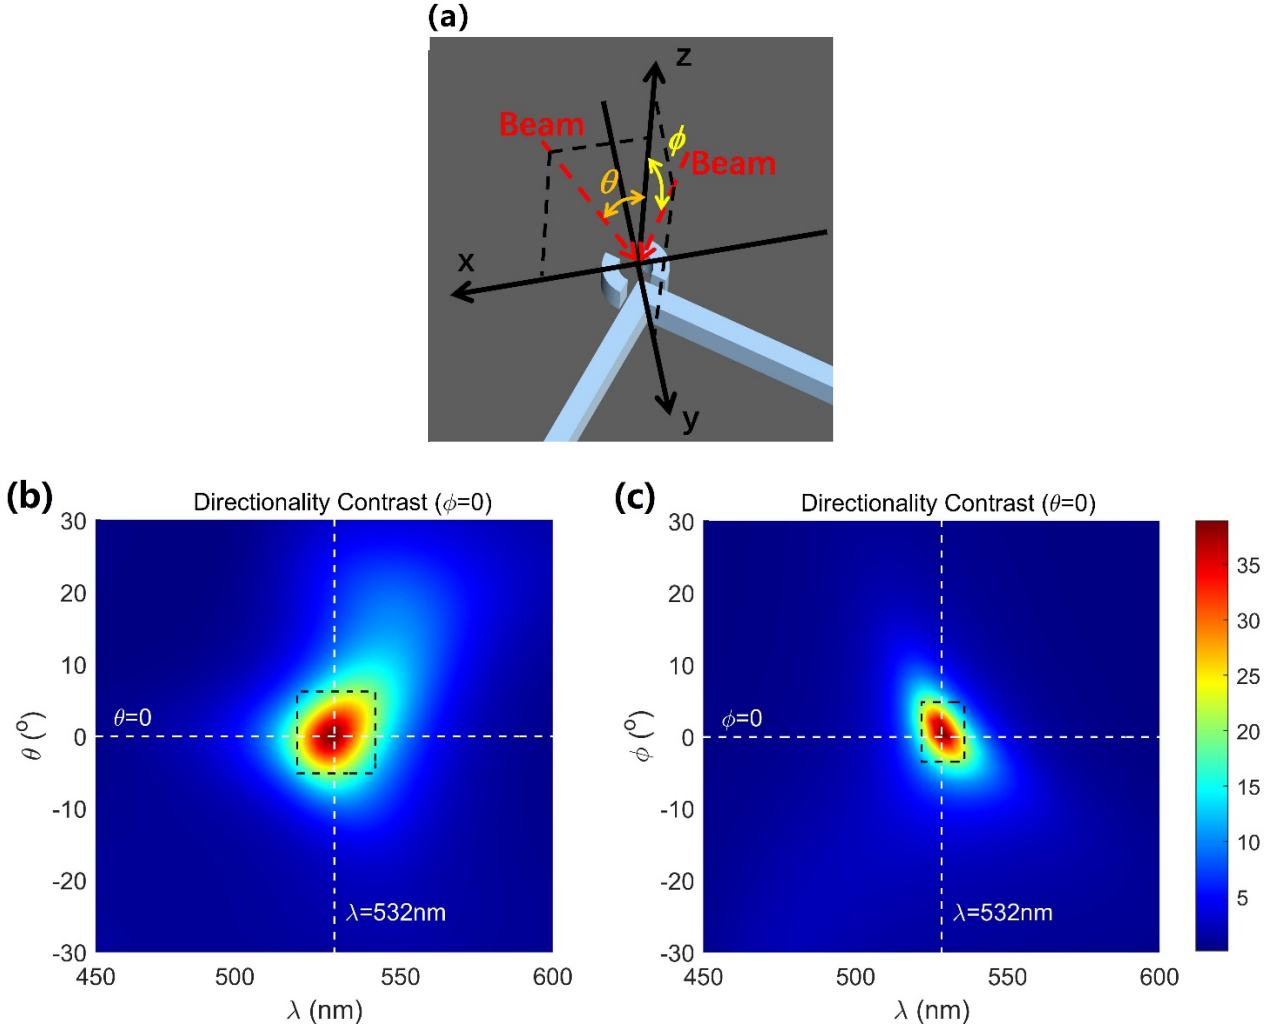

**Figure S1.2.** 3D-FDTD study of the directionality contrast as functions of both excitation wavelength and non-normal incident angle. (a) Schematic diagram of the considered coordinate system with respect to the proposed device. We assumed that the beam obliquely shines the device in the x-z plane and y-z plane, with incident angles of  $\theta$  and  $\phi$ , respectively. (b) Directionality contrast as functions of excitation wavelength and angle  $\theta$  with  $\phi = 0$ , which is clearly shown the resonant spectral characteristics for  $\theta$  varying from  $-6^\circ$  to  $6^\circ$ , as shown by the black dashed box. Two dashed white lines indicate the wavelength  $\lambda = 532$  nm and incident angle  $\theta = 0$ . (c) The influence of excitation wavelength and angle  $\phi$  on directionality contrast with  $\theta = 0$ . Same phenomenon is observed. The results demonstrate the proposed nanocircuit possesses a strong tolerance against the tilted incident angles within  $\pm 5^\circ$  in x-z and y-z planes ensuring a high average directionality contrast over 25.

## S2: Sample fabrication

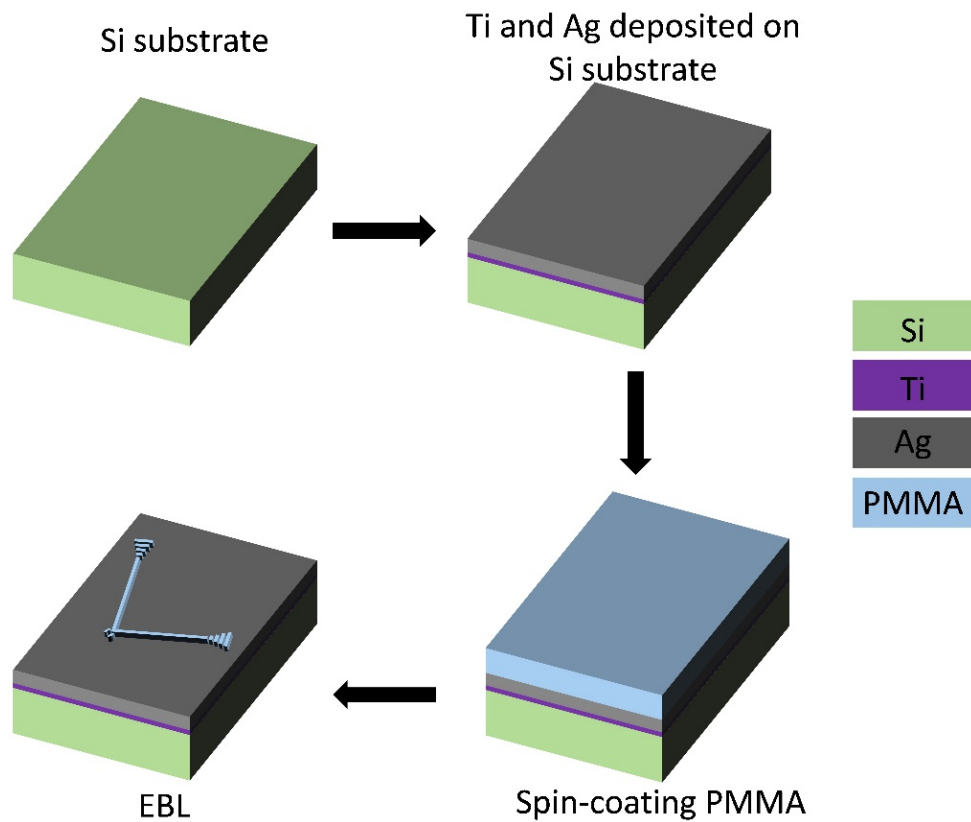

**Figure S2.1.** Fabrication process of the samples. The Ti and Ag films are successively deposited on the Si substrate. The structured Ag surface is then covered by a PMMA layer using spin-coating, and then the samples are prepared utilizing EBL.

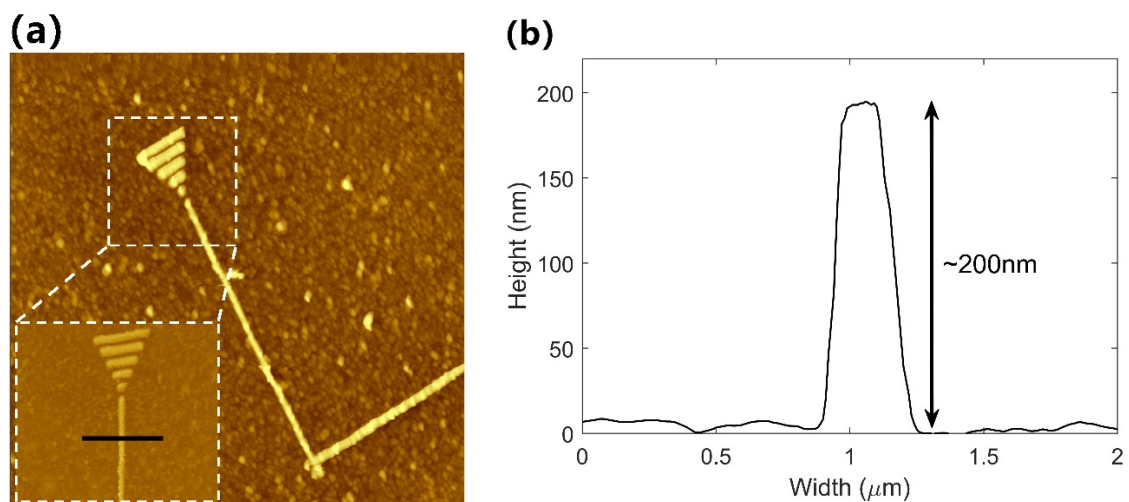

**Figure S2.2.** (a) The atomic force microscopy (AFM) image of the fabricated sample. (b) The height profile across the blackline depicted in the inset of (a), validating the fabrication precision.

### S3: Optical setup utilized for characterization of DLSPPs directionality

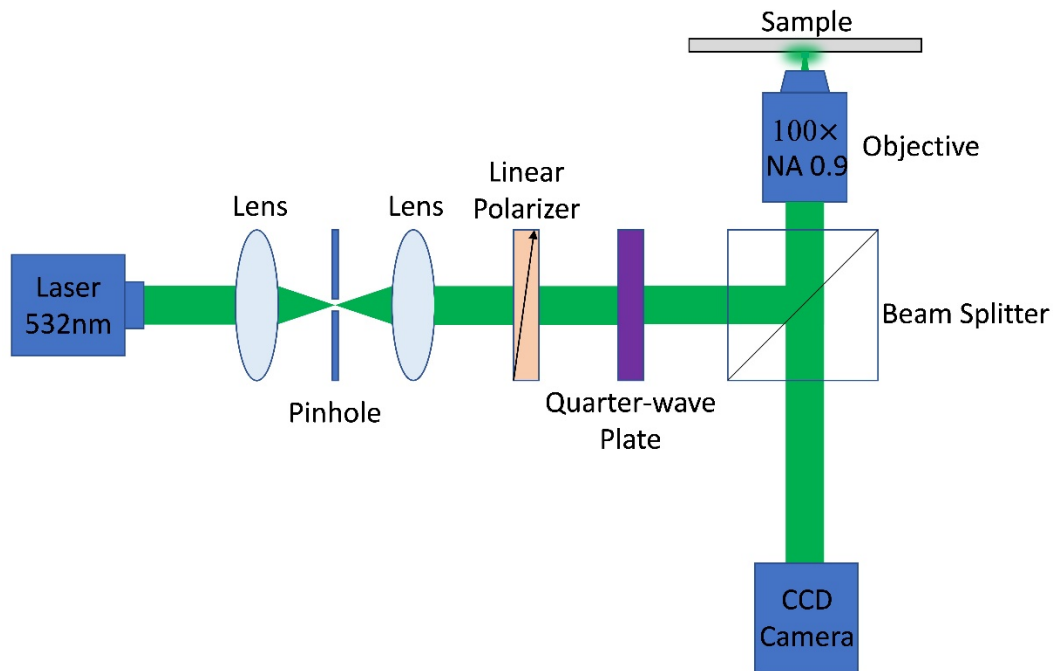

**Figure S3.** Experimental setup for characterizing emission properties of samples. A 532 nm laser beam is collimated by a set of lenses and pinhole, and passes a linear polarizer and a quarter-wave plate, resulting in continuously varied polarization states between LP, RCP and LCP by adjusting the orientation angle of quarter-wave plate with respect to linear polarizer. Afterwards, the beam is tightly focused onto the sample by an objective. The reflected signal is imaged onto a CCD camera.
